# Supplementary material
Source: publisher site journal article supplement (https://www.spandidos-publications.com/2335/downloadSupplementary)

Figure S1. Transfection efficiency of (A) miR-149-3p mimics and (B) miR-149-3p inhibitor was verified by reverse-transcription quantitative PCR. \*\*P<0.01. miR, microRNA; NC, negative control.

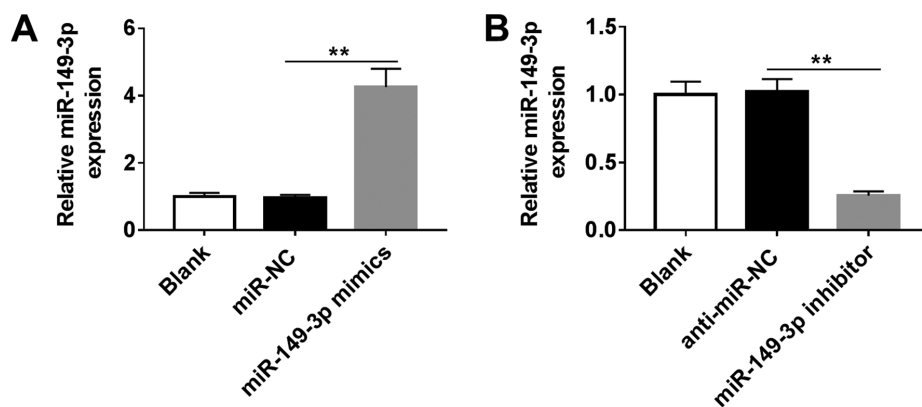

Supplement: Supplementary file 1 [file downloadSupplementary]
